1 **Mapping the Immunodominance Landscape of SARS-CoV-2 Spike Protein for**  
2 **the Design of Vaccines against COVID-19**

3 Bao-zhong Zhang<sup>2,\$</sup>, Ye-fan Hu<sup>1,4,\$</sup>, Lin-lei Chen<sup>3,\$</sup>, Yi-gang Tong<sup>5,\$</sup>, Jing-chu Hu<sup>2</sup>,  
4 Jian-piao Cai<sup>3</sup>, Kwok-Hung Chan<sup>3</sup>, Ying Dou<sup>1</sup>, Jian Deng<sup>1</sup>, Hua-rui Gong<sup>1</sup>,  
5 Chaiyaporn Kuwentrai<sup>1</sup>, Wenjun Li<sup>2</sup>, Xiao-lei Wang<sup>1</sup>, Hin Chu<sup>3</sup>, Cai-hui Su<sup>1</sup>, Ivan  
6 Fan-Ngai Hung<sup>4</sup>, Thomas Chung Cheung Yau<sup>4,\*</sup>, Kelvin Kai-Wang To<sup>3,\*</sup>, Kwok Yung  
7 Yuen<sup>3,\*</sup>, Jian-Dong Huang<sup>1,2,\*</sup>

8

9 <sup>1</sup> School of Biomedical Sciences, Li Ka Shing Faculty of Medicine, University of  
10 Hong Kong, 3/F, Laboratory Block, 21 Sassoon Road, Hong Kong, China

11 <sup>2</sup> Institute of Synthetic Biology, Shenzhen Institutes of Advanced Technology,  
12 Chinese Academy of Sciences, 1068 Xueyuan Avenue, University Town, Nanshan,  
13 Shenzhen, 518055, China

14 <sup>3</sup> Department of Microbiology, University of Hong Kong, 19/F T Block, Queen Mary  
15 Hospital, 102 Pokfulam Road, Hong Kong, China

16 <sup>4</sup> Department of Medicine, University of Hong Kong, 4/F Professional Block, Queen  
17 Mary Hospital, 102 Pokfulam Road, Hong Kong, China

18 <sup>5</sup> Beijing Advanced Innovation Centre for Soft Matter Science and Engineering  
19 (BAIC-SM), College of Life Science and Technology, Beijing University of Chemical  
20 Technology

21 <sup>\$</sup> Equal contribution.

22 <sup>\*</sup> Corresponding authors.

23

24 **Abstract**

25 The ongoing coronavirus disease 2019 (COVID-19) pandemic is a serious threat to  
26 global public health, and imposes severe burdens on the entire human society. The  
27 severe acute respiratory syndrome (SARS) coronavirus-2 (SARS-CoV-2) can cause  
28 severe respiratory illness and death. Currently, there are no specific antiviral drugs  
29 that can treat COVID-19. Several vaccines against SARS-CoV-2 are being actively  
30 developed by research groups around the world. The surface S (spike) protein and the  
31 highly expressed internal N (nucleocapsid) protein of SARS-CoV-2 are widely  
32 considered as promising candidates for vaccines. In order to guide the design of an  
33 effective vaccine, we need experimental data on these potential epitope candidates. In  
34 this study, we mapped the immunodominant (ID) sites of S protein using sera samples  
35 collected from recently discharged COVID-19 patients. The SARS-CoV-2 S protein-  
36 specific antibody levels in the sera of recovered COVID-19 patients were strongly  
37 correlated with the neutralising antibody titres. We used epitope mapping to  
38 determine the landscape of ID sites of S protein, which identified nine linearized B  
39 cell ID sites. Four out of the nine ID sites were found in the receptor-binding domain  
40 (RBD). Further analysis showed that these ID sites are potential high-affinity SARS-  
41 CoV-2 antibody binding sites. Peptides containing two out of the nine sites were  
42 tested as vaccine candidates against SARS-CoV-2 in a mouse model. We detected  
43 epitope-specific antibodies and SARS-CoV-2-neutralising activity in the immunised  
44 mice. This study for the first time provides human serological data for the design of  
45 vaccines against COVID-19.

46

## 47 **Introduction**

48 The coronavirus disease 2019 (COVID-19), a novel infectious disease caused by  
49 severe acute respiratory syndrome coronavirus 2, SARS-CoV-2, first emerged in  
50 December 2019 and has since become a worldwide pandemic. COVID-19 infections  
51 have so far led to over 2 million cases and more than 0.13 million deaths across more  
52 than 200 countries and geographical regions around the world. The World Health  
53 Organization has launched a worldwide clinical trial called SOLIDARITY to test  
54 antiviral treatment options for the novel coronavirus, but as of April 15, 2020, there  
55 are no specific drugs for treating COVID-19<sup>1</sup>. Many research teams worldwide are  
56 racing to develop vaccines against SARS-CoV-2 to combat this novel coronavirus  
57 pandemic.

58 Similar to other coronaviruses, SARS-CoV-2 is an enveloped positive-stranded RNA  
59 virus with four major structural proteins: S (spike), E (envelope), M (membrane), and  
60 N (nucleocapsid) proteins<sup>2-4</sup>. The surface S protein is the key that allows SARS-COV-  
61 2 to enter into cells<sup>5</sup>, as it plays a role in binding to the cellular receptor and  
62 membrane fusion<sup>5,6</sup>. The SARS-CoV-2 shares 75.96% homology with the 2003  
63 SARS-CoV<sup>3</sup>, and the structure and functional domains of the SARS-CoV-2 S protein  
64 have already been identified<sup>7</sup>. The receptor-binding domain (RBD) within the S1  
65 domain binds to angiotensin-converting enzyme 2 (ACE2) to facilitate the entry of  
66 SARS-CoV-2 into host cells<sup>6,7</sup>.

67 As of April 8, 2020, there are at least 115 vaccine candidates in active development  
68 worldwide<sup>8</sup>. The SARS-CoV-2 S (spike) glycoprotein is the immunogen that is the  
69 focus of the majority of the vaccine research. In the absence of *in vivo* and *in vitro*  
70 data, researchers have been using *in silico* data based on the IEDB database or other  
71 online epitope prediction algorithms<sup>9-14</sup>. However, the *in silico* data is less likely to be  
72 useful for vaccine development, because these bioinformatics tools were not  
73 optimised for vaccine design. Furthermore, the antigenic properties of S proteins  
74 remain elusive, and therefore experimental immunogenic information is urgently  
75 needed.

76 Although a putative epitope that binds to antibodies against SARS-CoV-2 has been  
77 reported<sup>15</sup>, more epitopes with high affinity need to be identified. Information on  
78 these epitopes would be useful, particularly in regard to human immunological bias

79 and immunodominance (ID), which might restrict the immune response.  
80 Immunodominance is the phenomenon of immunogenic variation among distinct  
81 immunogens or antigenic sites on the same immunogen, which has been demonstrated  
82 in both CD8<sup>+</sup> T cells and B cells<sup>16</sup>. This phenomenon has restricted the development  
83 of effective vaccines for influenza A and other highly variable viruses<sup>17-19</sup>. All the  
84 methods used to overcome or manipulate these viral immunity restrictions rely on the  
85 landscape of immunodominance. It is therefore crucial to map the immunogenicity  
86 landscape of the potential epitopes of the S protein to accelerate the development of  
87 vaccines.

88 An ideal vaccine against SARS-CoV-2 should induce highly potent neutralising  
89 antibodies but should not induce any disease-enhancing antibodies. Previous studies  
90 that used the full-length S protein of SARS-CoV to immunise animals resulted in  
91 adverse effect after the animals were challenged with SARS-CoV<sup>20</sup>. Jiang et al.,  
92 identified five linear immunodominant (ID) sites in the S protein that did not induce  
93 neutralising antibodies. On the contrary, the RBD was found to contain the major  
94 neutralising epitopes in the S protein, but did not have any ID sites<sup>21</sup>.

95 In this study, we aimed to map the landscape of ID sites within the S protein of  
96 SARS-CoV-2 and compare these results with those of its counterpart in SARS-CoV.  
97 Unlike SARS-CoV, we found the RBD of SARS-CoV-2 had linear ID sites in sera  
98 samples collected from recently discharged COVID-19 patients. Subsequent  
99 microneutralisation tests demonstrated that mice immunised with peptides containing  
100 the ID sites within RBD produced neutralising antibodies. Taken together, the RBD of  
101 SARS-CoV-2 has a different ID landscape to its counterpart in SARS-CoV.  
102 Furthermore, these data can provide guidance on the design of S protein-based SARS-  
103 CoV-2 vaccines that might avoid adverse reactions or disease-enhancing effects.

104

## 105 **Materials and Methods**

### 106 **Serum specimens from COVID-19 patients**

107 Serum samples were collected from 39 patients with COVID-19 (22 males and 17  
108 females) between Jan 26, 2020, and March 18, 2020. Twenty-six patients who were  
109 discharged from hospital provided written informed consent under UW 13-265. The  
110 other 13 hospitalized patients were sampled under UW 13-372, and written informed  
111 consent was waived. Average sampling time from the onset date was 28.7 days (range,  
112 14–44 days). The median age of patients was 59.7 years (range, 26-80 years). All  
113 patients were diagnosed with COVID-19 by PCR test, and two patients had a severe  
114 illness. The diagnostic criteria for SARS-CoV infection followed the clinical  
115 description of COVID-19<sup>22</sup>. The initial laboratory confirmation was performed on  
116 nasopharyngeal or sputum specimens at the Public Health Laboratory Centre of Hong  
117 Kong. The discharge criteria were clinically stable and negative nucleic acid test  
118 twice consecutively (sampling interval  $\geq$  24 hours). Six healthy donors were also  
119 sampled under UW 19-470. This study was approved by the Institutional Review  
120 Board of the University of Hong Kong/Hospital Authority Hong Kong West Cluster  
121 (UW 13-372, UW 13-265, and UW 19-470).

### 122 **Animal experiments**

123 The SPF BALB/c mice were supplied by the Laboratory Animal Unit of the  
124 University of Hong Kong. All animal experiments were approved by the Committee  
125 on the Use of Live Animals in Teaching & Research, the University of Hong Kong  
126 (CULATR 5312-20). All mice were immunised by distinct vaccines on Day 0 and  
127 Day 14.

### 128 **Synthesis of peptides**

129 All peptides were manufactured by GL Biochem (Shanghai) Ltd in the form of a dry  
130 powder. The peptides were generated using solid phase synthesis methods and the  
131 quality of the products was monitored by mass spectrometry. All peptides were  
132 dissolved in pH 7.4 PBS buffer or 8 M pH 7.0 urea Na<sub>2</sub>HPO<sub>4</sub>/NaH<sub>2</sub>PO<sub>4</sub> buffer.  
133 Peptides conjugated to keyhole limpet haemocyanin (KLH) carrier proteins were also  
134 purchased from GL Biochem (Shanghai) Ltd. These peptide-conjugated proteins were  
135 dissolved in a pH 7.4 PBS buffer.

136

### 137 **Antibody detection using ELISA**

138 Epitope-specific antibodies were detected by enzyme-linked immunosorbent assay  
139 (ELISA). Briefly, all peptides at a final concentration of 0.5 µg/mL in 50 mM pH 9.6  
140 Na<sub>2</sub>CO<sub>3</sub>/NaHCO<sub>3</sub> buffer were coated on ELISA plates (Nunc, Roskilde, Denmark)  
141 and incubated overnight at 4°C. Plates were blocked with TBS-5% (w/v) non-fat milk  
142 for 3 h at 37°C and washed four times in 0.05% Tween in TBST. Diluted patient or  
143 mice sera were added into the wells and incubated for 1 h at 37°C. Plates were  
144 washed six times in TBS-0.05% Tween and incubated with HRP-conjugated goat  
145 anti-mouse IgG for 1 h at 37°C. The colour was developed using Trimethyl Borane  
146 (TMB) solution (Sigma) and absorbance was measured at 450 nm using an ELISA  
147 reader. Samples from non-immunised mice or healthy volunteers were used as the  
148 controls. The cut-off lines were based on the mean value plus three times the standard  
149 deviation.

### 150 **Identification of T cell epitopes using ELISpot**

151 The T cell responses were detected by enzyme-linked immunosorbent spot (ELISpot)  
152 kits (Dakewe Biotech Co., Ltd) following the manufacturer's protocol. Briefly,  
153 splenocytes harvested from sacrificed mice were washed and immediately transferred  
154 to anti-IFN-γ antibody pre-coated filter plates. For stimulation, splenocytes were co-  
155 incubated with distinct epitopes overnight at 37°C. All samples were assayed with  
156 positive controls (Phorbol myristate acetate, PMA and Ionomycin) and cells from a  
157 reference donor. All images in different wells were captured using a CTL  
158 ImmunoSpot ELISpot Analyzer and processed using the ImmunoCapture software  
159 (Cellular Technology Ltd., USA).

### 160 **Microneutralisation tests**

161 Serial two-fold dilutions of heat-inactivated sera (treated at 56°C for 30 minutes) were  
162 prepared from a starting dilution of 1:10. The serum dilutions were mixed with equal  
163 volumes of 100 TCID<sub>50</sub> of SARS-CoV-2 as indicated. After 1 h of incubation at 37°C,  
164 35 µL of the virus-serum mixture was added to Vero-E6 cell monolayer for SARS-  
165 CoV-2 infection in 96-well microtitre plates in quadruplicate. After 1 h of adsorption,  
166 an additional 150 µL of culture medium was added to each well and incubated for 3  
167 days at 37°C in 5% CO<sub>2</sub> in a humidified incubator. A virus back-titration was  
168 performed without immune serum to assess the input virus dose. The CPE was read at

169 3 days post infection. The highest serum dilution that completely protected cells from  
170 CPE in half the wells was estimated using the Reed-Muench method and was taken as  
171 the neutralising antibody titre. Positive and negative control sera were included to  
172 validate the assay.

173 **Results**

174 **Immune responses and antiviral effects in serum from COVID-19 patients**

175 All serum samples from COVID-19 patients tested positive for SARS-CoV-2 by  
176 ELISA assay using plates coated by SARS-CoV-2 lysates (Figure 1A). The profiles of  
177 IgG, and IgM, and IgA against S (spike) and N (nucleocapsid) proteins showed that  
178 not all patients had elevated antibody titres compared to healthy donors (Figure 1B-G).  
179 Generally, high IgG titres against both S and N proteins were present in the sera,  
180 samples, and relatively high IgM and IgA responses were also observed in the  
181 majority of patients.

182 Our previous work revealed that the correlations between microneutralisation (MN)  
183 activity and anti-NP or anti-RBD IgG titres were stronger than the correlation  
184 between MN activity and IgM titre<sup>22</sup>. To further investigate the correlations between  
185 MN activity and anti-NP or anti-RBD IgG, IgM, and IgA titres, we carefully analysed  
186 the sera from recovered patients. We found MN activity in the sera of 26 out of 39  
187 COVID-19 patients. The MN titres were adjusted following previous criteria: MN  
188 titres less than 10 were re-designated a value of 5 and MN titres greater than 320 were  
189 re-designated a value of 640<sup>22</sup>. We identified a very strong correlation between anti-  
190 RBD IgG titres and MN activity in recovered patients ( $R^2 = 0.8009$ ). The correlations  
191 between anti-RBD IgM/IgA titres and MN activity were weaker than for IgG ( $R^2 =$   
192  $0.5130$  and  $0.5926$ , respectively) (Figure 2E, G, I). However, we found very poor  
193 correlations between anti-NP IgG/IgM/IgA titres and MN activity. These correlations  
194 dropped dramatically when MN activity titres were greater than 1:160 (Figure 2D, F,  
195 H). These results suggest that anti-RBD antibodies play an important role in the  
196 antiviral immune response.

197



## 198 **The landscape of immunodominant sites on the S protein in COVID-19 patients**

199 To identify the immunodominant (ID) sites on the SARS-CoV-2 S protein, we  
200 mapped the epitopes in 42 peptides spanning the entire extra-membrane domain (21-  
201 926) of the S protein with three gaps (106-160, 365-374, and 687-741). Each peptide  
202 was between 20 and 25 residues in length with a five-residue overlap. We measured  
203 ID sites in terms of the positive rate and the percentage of convalescent sera from  
204 COVID-19 patients having positive reactions to the epitope. Here, we used the mean  
205 response plus three times the standard deviation in healthy donors as the cut-off value  
206 to define positive reactions. The epitope mapping showed nine linear ID sites on the S  
207 protein located at 21-45(IDa), 221-245(IDb), 261-285(IDc), 330-349(IDd), 375-  
208 394(IDe), 450-469(IDf), 480-499(IDg), 522-646(IDh), and 902-926(IDi), respectively  
209 (Figure 3), with an average positive rate of  $\geq 50\%$  among all 39 patients. We found the  
210 SARS-CoV-2 RBD contained four ID sites, IDd, IDe, IDf, and IDg, whereas the  
211 SARS-CoV RBD has no ID sites. Considering the SARS-CoV-2 S protein shares  
212 75.96% identity with the SARS-CoV S protein, we found five out of the nine  
213 fragments, IDc (79.17%), IDd (90%), IDe (90%), IDh (79.2%), and IDi (96%) were  
214 evolutionarily highly conserved in the SARS-CoV S protein. However, only three of  
215 the nine ID sites, IDa (63.64%), IDh (79.05%), and IDi (96%) were highly  
216 homologous ( $>50\%$ ) to SARS-CoV S protein ID sites. These results suggest that the  
217 conserved regions contribute to the immunogenicity of the S protein, whereas the  
218 majority of ID sites (6 out of 9) were less likely to be conserved. Interestingly, some  
219 epitopes induced personalized immune responses in specific patients. Patient 33 had  
220 an extremely strong immune response to epitope S (21-45) with a 40 times increase  
221 compared to the cut-off value, whereas the responses of patients 26 to 31 were not  
222 significantly different compared to those of healthy donors. A similar response was  
223 also observed for S (281-305), which is less likely to be an ID site. (Figure 3A) These  
224 results suggest that some unexpected ID sites of the S protein might lead to highly  
225 variable immune responses in patients if immunised with certain viral proteins.

226 **Immunodominant sites can generate antiviral protection in a mouse model**

227 To examine if specific ID sites of the S protein can generate immune responses and  
228 antiviral effects, we immunised mice with the RBD and two epitopes (S370-395 and  
229 S435-479) of the S protein, which were selected based on the results of B cell epitope  
230 prediction, toxicity prediction, and allergenicity prediction (Figure 4A, B). The S370-  
231 395 and S435-479 epitopes were validated in our epitope mapping assay in patient  
232 sera, which showed positive rates of 51.3% and 74.4%, respectively. The ELISA  
233 assay showed that mice immunised with the entire RBD, S370-395, and S435-479  
234 generated high levels of specific antibodies (Figure 4C, D, E). In the MN test, mice  
235 immunised with S370-395, S435-479 or RBD showed viral neutralising titres of  
236 1:26.7, 1:16.7, and 1:33.3, respectively (Figure 4F).

237 The landscape of T cell epitopes in the RBD fragment was profiled by ELISpot assay,  
238 which revealed a distinct pattern compared to the B cell responses. In the RBD  
239 fragment, three of the T cell epitopes, S405-469, S480-499, and S510-521, induced  
240 strong adaptive responses after immunisation. Among the epitopes, S370-395, S450-  
241 469 and S480-499 were identified as ID sites in human sera (Figure 4G). The S370-  
242 395 and S435-479 epitopes are more likely to be both T cell ID sites and B cell ID  
243 sites.

244

## 245 **Immunodominant sites might reveal potent neutralising sites of S protein**

246 To validate the potential functions of ID sites, we highlighted the ID sites in the  
247 SARS-CoV-2 S protein structure model containing glycosylation sites<sup>23</sup> (Figure 5A-  
248 C). Among ID sites with positive rates ranging from 50% to 60%, five sites were  
249 located on the head region of the S protein and two sites were on the stem of the S  
250 protein (Figure 5B). Among ID sites with positive rates over 60%, all five epitopes  
251 were located on the head of the S protein (Figure 5C). Although the S protein is a  
252 glycoprotein, glycosylation modification had limited effects on immunisation. Two  
253 glycosylation sites, N331 and N343, were observed in the RBD region, but these sites  
254 had no influence on the immune response. In sera from patients, non-glycosylated  
255 peptides were able to induce immune responses (Figure 3A, C and Figure 4G, S330-  
256 349).

257 The neutralising titre results (Figure 4F) suggest the ID sites have neutralising  
258 activities against SARS-CoV-2, although the ID sites in SARS-CoV were unlikely to  
259 be neutralising sites<sup>20</sup>. To further validate the ID sites, we compared the binding  
260 residues of the S protein to reported monoclonal antibodies with the ID sites of  
261 RBD<sup>15,24,25</sup>. Interestingly, some binding residues of SARS-CoV-2-specific  
262 neutralising antibodies were highly similar to the ID sites (Figure 5). For CR3022, a  
263 monoclonal antibody targeting a highly conserved cryptic epitope<sup>15</sup>, 14 out of 28  
264 binding residues of SARS-CoV-2 RBD were located in ID sites. For F26G19, a  
265 mouse antibody, 11 out of 20 sites were located at ID sites, indicating there was likely  
266 a relatively high binding affinity to the RBD fragment<sup>25</sup>. However, for m396, an  
267 antibody with relatively low binding affinity to SARS-CoV-2 RBD, only 5 out of 22  
268 binding residues were located at ID sites<sup>24</sup>. This was also the case for R80, another  
269 low binding affinity antibody, which had no matching binding residues<sup>24</sup>. These  
270 results suggest that SARS-CoV-2 ID sites are potent neutralising sites for high-  
271 affinity antibodies.

## 272 **Discussion**

273 In this study, we profiled IgG/IgM/IgA levels against the S protein and N protein in  
274 the sera of COVID-19 patients (Figure 1). All convalescent sera from the COVID-19  
275 patients contained specific antibodies against recombinant SARS-CoV-2 N protein,  
276 but not all sera had specific antibodies for the RBD fragment of the S protein. The  
277 relatively high immunogenicity of SARS-CoV-2 N protein during infection showed it  
278 has potential as an antigen for developing COVID-19 diagnostics (Figure 1). However,  
279 amounts of the different antibodies varied across patients. We found that IgM  
280 contributed 5%-34% of N protein-specific antibodies, whereas anti-RBD IgM  
281 contributed 10%-49% of RBD-specific antibodies. Patients with acute SARS-CoV-2  
282 infection displayed highly diverse immune responses, and this diversity remained  
283 until convalescence. These diverse immune responses highlight safety concerns such  
284 as secondary infections that need to be considered.

285 We also analysed the correlation between S or N protein-specific antibody levels and  
286 SARS-CoV-2 neutralising titres. The Spike RBD-specific antibody level displayed a  
287 strong linear correlation with MN titres, but not with the N-specific antibody level  
288 (Figure 2). This observation suggests that RBD-specific antibodies in the sera of  
289 recovered patients might provide antiviral protection mainly through neutralising  
290 activity rather than non-neutralising antibodies against the N protein. This suggests  
291 that manipulating the RBD-induced immune responses might be more effective for  
292 developing COVID-19 vaccines.

293 This is the first reported mapping of the landscape of the ID sites in the S protein of  
294 SARS-CoV-2 using sera from COVID-19 patients (Figure 3). The personalized  
295 immune response pattern needs to be further investigated as unexpected and highly  
296 variable immune responses in some individuals might lead to adverse events or  
297 disease-enhancing responses to certain viral proteins used as vaccines. We further  
298 tested if the ID sites in the RBD fragment could be used as potential vaccines in mice.  
299 We found that epitopes/protein-specific antibody titres exceeded the  
300 microneutralisation titres by several orders of magnitude. Considering the relatively  
301 low neutralising antibody levels in the recovered patients in this study and in a  
302 previous report<sup>26</sup>, it is reasonable to expect significant differences between specific  
303 antibodies and neutralising antibodies. We found there was equivalent antiviral  
304 activity from immunisation with epitopes compared to immunisation with the entire

305 RBD fragment (Figure 4). This provides evidence that epitope-based vaccines could  
306 offer comparable protection compared to subunit vaccines, but with the potentially  
307 better safety.

308 We also compared binding residues of previously identified SARS-CoV-2  
309 neutralising antibodies with ID epitopes. The ID sites in the RBD were found to be  
310 potent neutralising sites for SARS-CoV-2 (Figure 5). Previous research suggests that  
311 it might be better to overcome the immunodominance of non-neutralising antigenic  
312 epitopes for SARS-CoV<sup>20,27</sup>, influenza virus A<sup>16</sup>, dengue fever virus<sup>28</sup>, and human  
313 immunodeficiency virus<sup>19</sup>, which can potentially enhance the disease. Indeed a prior  
314 study on SARS-CoV implicated ID sites in antibody-dependent enhancement  
315 (ADE)<sup>27,29</sup>. Recent research showed that passive immunisation with early  
316 convalescent COVID-19 serum in hamsters resulted in significantly lower viral loads  
317 in the respiratory tract without apparent differences in the clinical signs and  
318 histopathological changes<sup>30</sup>. Even so, these results provide limited information on ID.  
319 We still do not know how to effectively target immunodominance, and we still need  
320 to understand the mechanism underlying this phenomenon.

321 Several candidate vaccines against SARS-CoV-2 including mRNA, inactivated virus,  
322 and recombinant adenovirus vaccines have started phase I clinical trials in the US and  
323 China<sup>8</sup>. However, there are no reports on the targets of these candidate vaccines, and  
324 they might have disease-enhancing effects. Our findings provide evidence for using  
325 specific linear antigenic epitopes of S protein instead of the entire S protein for  
326 vaccines against SARS-CoV-2 with better safety.

327

328

329 **Acknowledgements**

330 We would like to thank the technicians in the laboratories of JD Huang and KY Yuen  
331 for their help in running the project. This work was supported by Health and Medical  
332 Research Fund (HKM-15-M09), the Shenzhen Peacock Team Project  
333 (KQTD2015033117210153), Shenzhen Science and Technology Innovation  
334 Committee Basic Science Research Grant (JCYJ20170413154523577) and China  
335 Postdoctoral Science Foundation (2019M663167).

336 **Author Contributions**

337 BZ Zhang, YF Hu, LL Chen, YG Tong, TCC Yau, KKW To, KY Yuen, and JD  
338 Huang designed the study. IFN Hung recruited all the patients. BZ Zhang, YF Hu, KH  
339 Chan, and LL Chen performed the experiments. JC Hu, JP Cai, Y Dou, J Deng, HR  
340 Gong, C Kuwentrai, WJ Li, XL Wang, H Chu, and CH Su participated in the study.  
341 BZ Zhang, YF Hu, LL Chen, YG Tong, TCC Yau, KKW To, KY Yuen, and JD  
342 Huang analysed the data. BZ Zhang, YF Hu, and JD Huang wrote the manuscript.

343 **Competing Interests**

344 The authors declare that they have no competing interests.

345 **Data and Materials Availability**

346 All data used to draw the conclusions in the paper are presented in the paper and/or  
347 the supplementary materials.

348

## 349 **References**

- 350 1. Kupferschmidt K & J, C. WHO launches global megatrial of the four most  
351 promising coronavirus treatments. *Science* (2020).
- 352 2. Wu, F., *et al.* A new coronavirus associated with human respiratory disease in  
353 China. *Nature* **579**, 265-269 (2020).
- 354 3. Lu, R., *et al.* Genomic characterisation and epidemiology of 2019 novel  
355 coronavirus: implications for virus origins and receptor binding. *The Lancet* **395**,  
356 565-574 (2020).
- 357 4. Zhou, P., *et al.* A pneumonia outbreak associated with a new coronavirus of  
358 probable bat origin. *Nature*, 1-4 (2020).
- 359 5. Hoffmann, M., *et al.* SARS-CoV-2 cell entry depends on ACE2 and TMPRSS2  
360 and is blocked by a clinically proven protease inhibitor. *Cell* (2020).
- 361 6. Yan, R., *et al.* Structural basis for the recognition of SARS-CoV-2 by full-length  
362 human ACE2. *Science* **367**, 1444-1448 (2020).
- 363 7. Wrapp, D., *et al.* Cryo-EM structure of the 2019-nCoV spike in the prefusion  
364 conformation. *Science* **367**, 1260-1263 (2020).
- 365 8. Le, T.T., *et al.* The COVID-19 vaccine development landscape. *Nature Reviews*  
366 *Drug Discovery* (2020).
- 367 9. Grifoni, A., *et al.* A Sequence Homology and Bioinformatic Approach Can Predict  
368 Candidate Targets for Immune Responses to SARS-CoV-2. *Cell host & microbe*  
369 (2020).
- 370 10. Ahmed, S.F., Quadeer, A.A. & McKay, M.R. Preliminary identification of potential  
371 vaccine targets for the COVID-19 coronavirus (SARS-CoV-2) based on SARS-  
372 CoV immunological studies. *Viruses* **12**, 254 (2020).
- 373 11. Bhattacharya, M., *et al.* Development of epitope-based peptide vaccine against  
374 novel coronavirus 2019 (SARS-COV-2): Immunoinformatics approach. *Journal of*  
375 *Medical Virology* (2020).
- 376 12. Zheng, M. & Song, L. Novel antibody epitopes dominate the antigenicity of  
377 spike glycoprotein in SARS-CoV-2 compared to SARS-CoV. *Cellular &*  
378 *molecular immunology*, 1-3 (2020).
- 379 13. Fast, E. & Chen, B. Potential T-cell and B-cell Epitopes of 2019-nCoV. *bioRxiv*  
380 (2020).
- 381 14. Lucchese, G. Epitopes for a 2019-nCoV vaccine. *Cellular & Molecular*  
382 *Immunology*, 1-2 (2020).
- 383 15. Yuan, M., *et al.* A highly conserved cryptic epitope in the receptor-binding  
384 domains of SARS-CoV-2 and SARS-CoV. *Science* (2020).
- 385 16. Angeletti, D. & Yewdell, J.W. Understanding and manipulating viral immunity:  
386 antibody immunodominance enters center stage. *Trends in immunology* **39**,  
387 549-561 (2018).
- 388 17. Dale, G.A., Shartouny, J.R. & Jacob, J. Quantifying the shifting landscape of B cell  
389 immunodominance. *Nature immunology* **18**, 367-368 (2017).
- 390 18. Angeletti, D., *et al.* Defining B cell immunodominance to viruses. *Nature*  
391 *immunology* **18**, 456 (2017).
- 392 19. Cirelli, K.M., *et al.* Slow delivery immunization enhances HIV neutralizing  
393 antibody and germinal center responses via modulation of immunodominance.  
394 *Cell* **177**, 1153-1171. e1128 (2019).

- 395 20. Jiang, S., He, Y. & Liu, S. SARS vaccine development. *Emerging infectious*  
396 *diseases* **11**, 1016 (2005).
- 397 21. He, Y., *et al.* Identification of immunodominant sites on the spike protein of  
398 severe acute respiratory syndrome (SARS) coronavirus: implication for  
399 developing SARS diagnostics and vaccines. *The Journal of Immunology* **173**,  
400 4050-4057 (2004).
- 401 22. To, K.K.-W., *et al.* Temporal profiles of viral load in posterior oropharyngeal  
402 saliva samples and serum antibody responses during infection by SARS-CoV-2:  
403 an observational cohort study. *The Lancet Infectious Diseases* (2020).
- 404 23. Walls, A.C., *et al.* Structure, function, and antigenicity of the SARS-CoV-2 spike  
405 glycoprotein. *Cell* (2020).
- 406 24. Tian, X., *et al.* Potent binding of 2019 novel coronavirus spike protein by a SARS  
407 coronavirus-specific human monoclonal antibody. *Emerging microbes &*  
408 *infections* **9**, 382-385 (2020).
- 409 25. Park, T., *et al.* Spike protein binding prediction with neutralizing antibodies of  
410 SARS-CoV-2. *bioRxiv* (2020).
- 411 26. Wu, F., *et al.* Neutralizing antibody responses to SARS-CoV-2 in a COVID-19  
412 recovered patient cohort and their implications. (2020).
- 413 27. Wang, Q., *et al.* Immunodominant SARS coronavirus epitopes in humans elicited  
414 both enhancing and neutralizing effects on infection in non-human primates.  
415 *ACS infectious diseases* **2**, 361-376 (2016).
- 416 28. Hughes, H.R., Crill, W.D. & Chang, G.-J.J. Manipulation of immunodominant  
417 dengue virus E protein epitopes reduces potential antibody-dependent  
418 enhancement. *Virology journal* **9**, 115 (2012).
- 419 29. Liu, L., *et al.* Anti-spike IgG causes severe acute lung injury by skewing  
420 macrophage responses during acute SARS-CoV infection. *JCI insight* **4**(2019).
- 421 30. Chan, J.F.-W., *et al.* Simulation of the clinical and pathological manifestations of  
422 Coronavirus Disease 2019 (COVID-19) in golden Syrian hamster model:  
423 implications for disease pathogenesis and transmissibility. *Clinical Infectious*  
424 *Diseases* (2020).

425

426



427 **Figure Legends and Table**

428 **Figure 1. Detection of antibodies specific for SARS-CoV-2 proteins in early**  
429 **convalescent sera from COVID-19 patients by ELISA.** (A) Total proteins from  
430 SARS-CoV-2 lysates were used as the coated antigen. (B-D) The recombinant N  
431 protein was used as the coated antigen. (E-G) The recombinant SP\_RBD protein was  
432 used as the coated antigen. (H-I) Antibody isotyping of N and SP\_RBD binding  
433 antibodies in early convalescent sera from COVID-19 patients. Sera from 39 COVID-  
434 19 patients, and 6 healthy blood donors were tested at a dilution of 1:100. The dashed  
435 lines represent cut-off values (the mean absorbance at 450 nm of sera from healthy  
436 blood donors plus three times the standard deviation).

437

438 **Figure 2. Correlations between S or N protein-specific antibody titres and**  
439 **microneutralisation antibody titres.** (A-C) N protein or RBD fragment of S protein-  
440 specific IgG levels and microneutralisation (MN) assay results of recovered patients'  
441 antibody titres. (D-E) Correlation between N protein or RBD fragment of S protein-  
442 specific IgG levels and microneutralisation antibody titres. (F-G) Correlation between  
443 N protein or RBD fragment of S protein-specific IgM levels and microneutralisation  
444 antibody titres. (H-I) Correlation between N protein or RBD fragment of S protein-  
445 specific IgA levels and microneutralisation antibody titres.

446

447 **Figure 3. Epitope landscape of SARS-CoV-2 S proteins in convalescent sera from**  
448 **COVID-19 patients by ELISA.** (A) The landscape of adjusted epitope-specific  
449 antibody levels in each patient. The ELISA results of absorbance at 450 nm were  
450 normalized to the aforementioned cut-off values. (B) Schematic representation of  
451 SARS-CoV-2 S protein and identified immunodominant sites. Here, only epitopes  
452 with positive rates greater than 50% are immunodominant. (C) Positive rates of  
453 distinct epitopes of SARS-CoV-2 S protein.

454

455 **Figure 4. B Cell and T Cell responses to distinct epitopes in SARS-CoV-2**  
456 **immunised mice.** (A-B) Schematic representation of the mouse immunisation  
457 schedule. Balb/C mice (n = 5 per group) were immunised subcutaneously (s.c) with  
458 25 µg of rRBD and KLH-conjugated peptides S370-395 and S435-479 mixed with

459 aluminium hydroxide gel (AHG). (C-E) rRBD-specific antibody responses in  
460 immunised mice. rRBD-specific IgG antibody responses in mouse sera collected at 7  
461 days after the second vaccination. (F) Virus microneutralisation antibody titres were  
462 measured against SARS-CoV-2 in classical BSL3. (G) Number of IFN- $\gamma$ -secreting  
463 splenocytes in response to stimulation with the 12 RBD peptide pools of 20-mer  
464 peptides. SFU: spot-forming units

465

466 **Figure 5. Structural representation of immunodominant and potential**  
467 **neutralising sites in SARS-CoV-2 RBD.** (A) Top view and side view of the S (spike)  
468 protein in trimer form with labelled RBD region and glycosylation sites. (B) Top view  
469 and side view of the S (spike) protein with immunodominant sites with positive rates  
470 ranging from 50% to 60%. (C) Top view and side view of the S (spike) protein with  
471 immunodominant sites with positive rates greater than 60%. (D) Amino acid sequence  
472 alignment of SARS-CoV-2 and SARS-CoV RBD sequences. Related neutralising  
473 antibody binding sites, ACE2 binding sites, prominent alterations, and  
474 immunodominant sites of SARS-CoV-2 and SARS-CoV are shown.

475

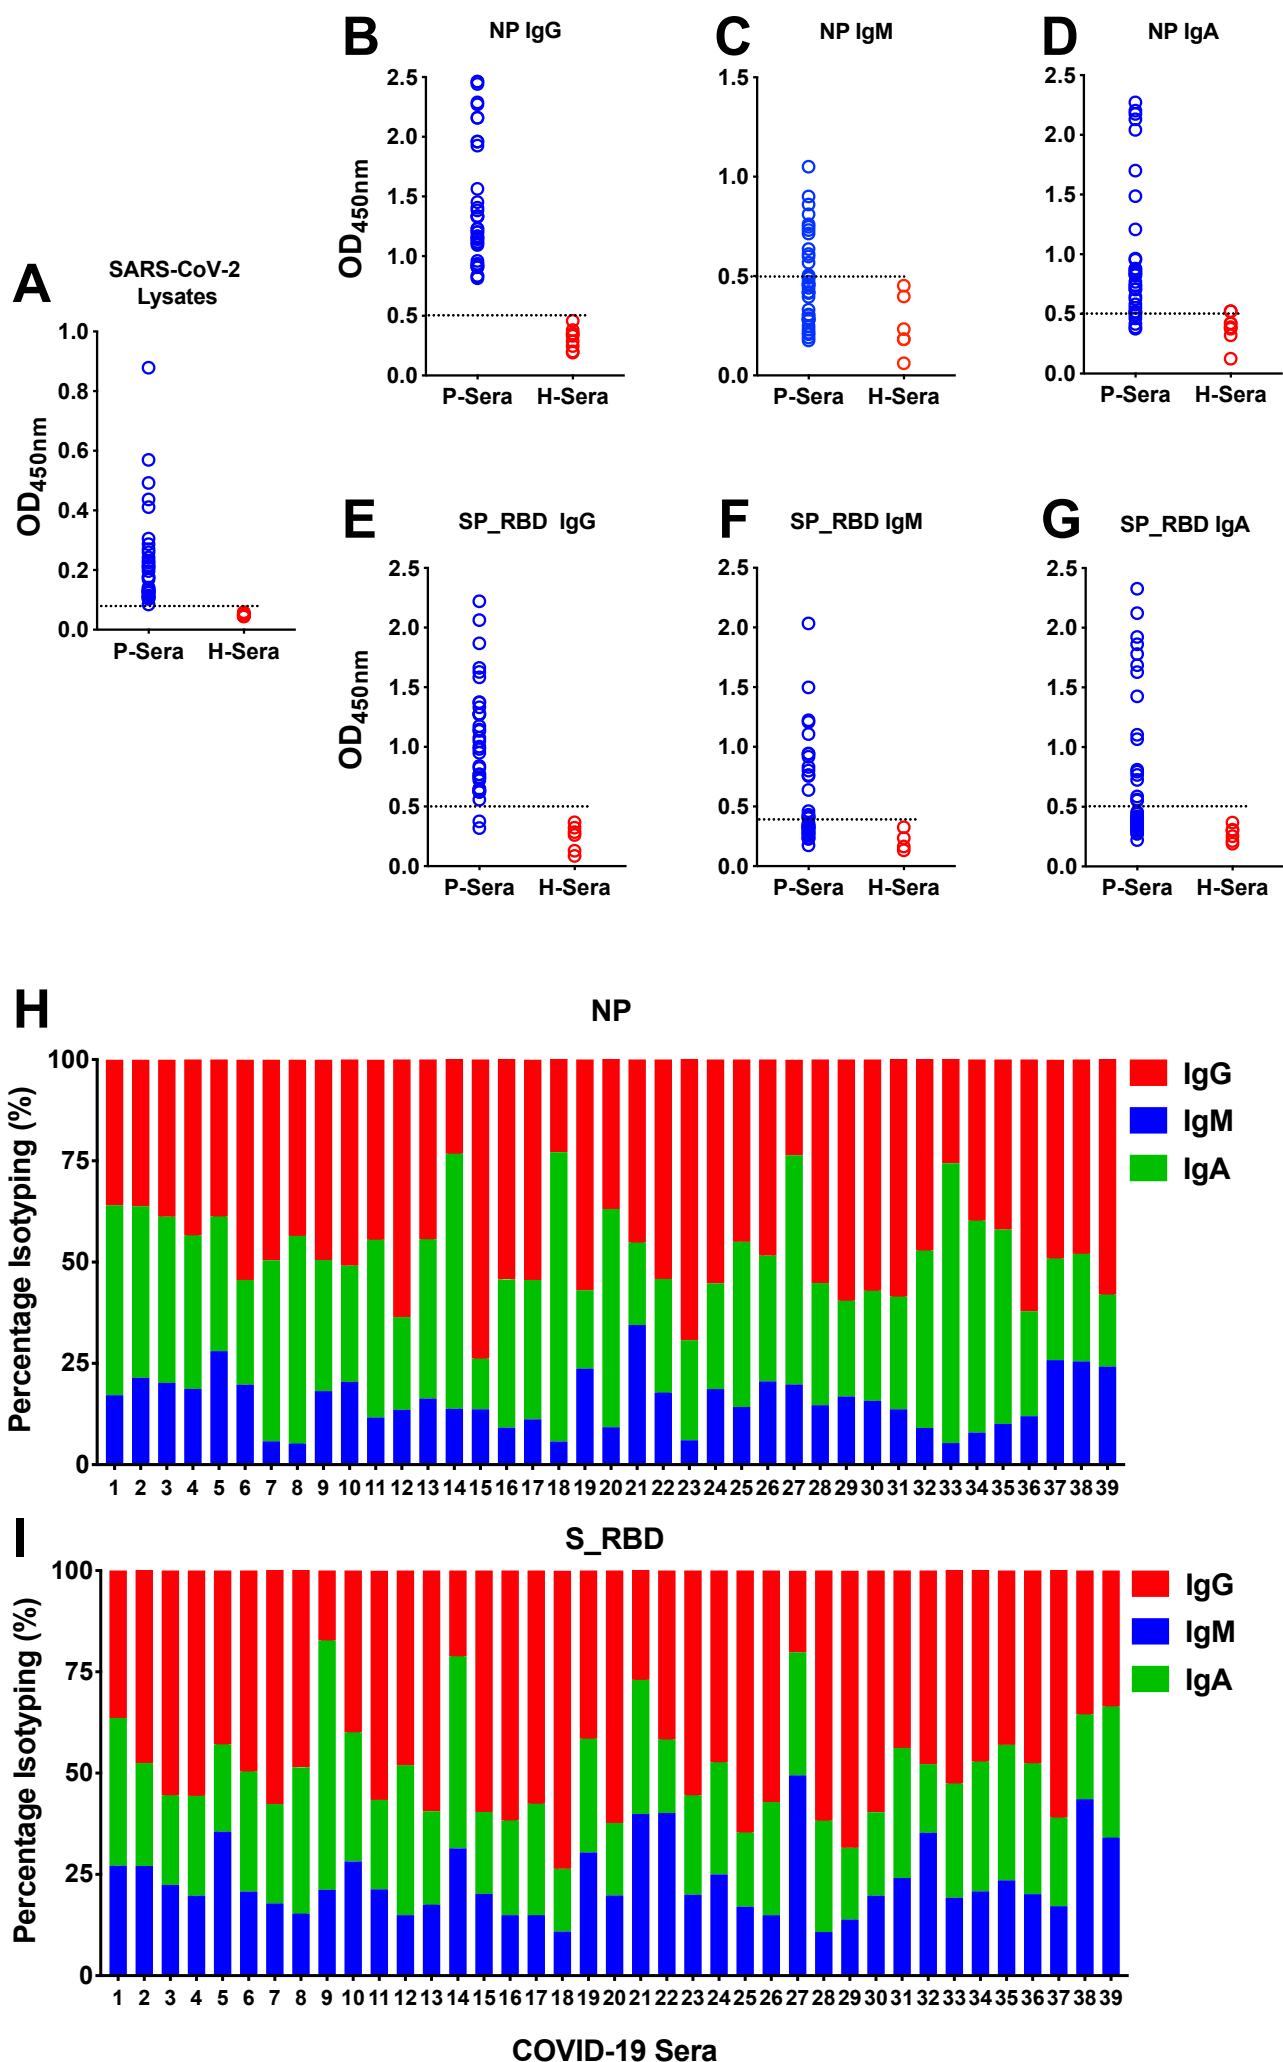

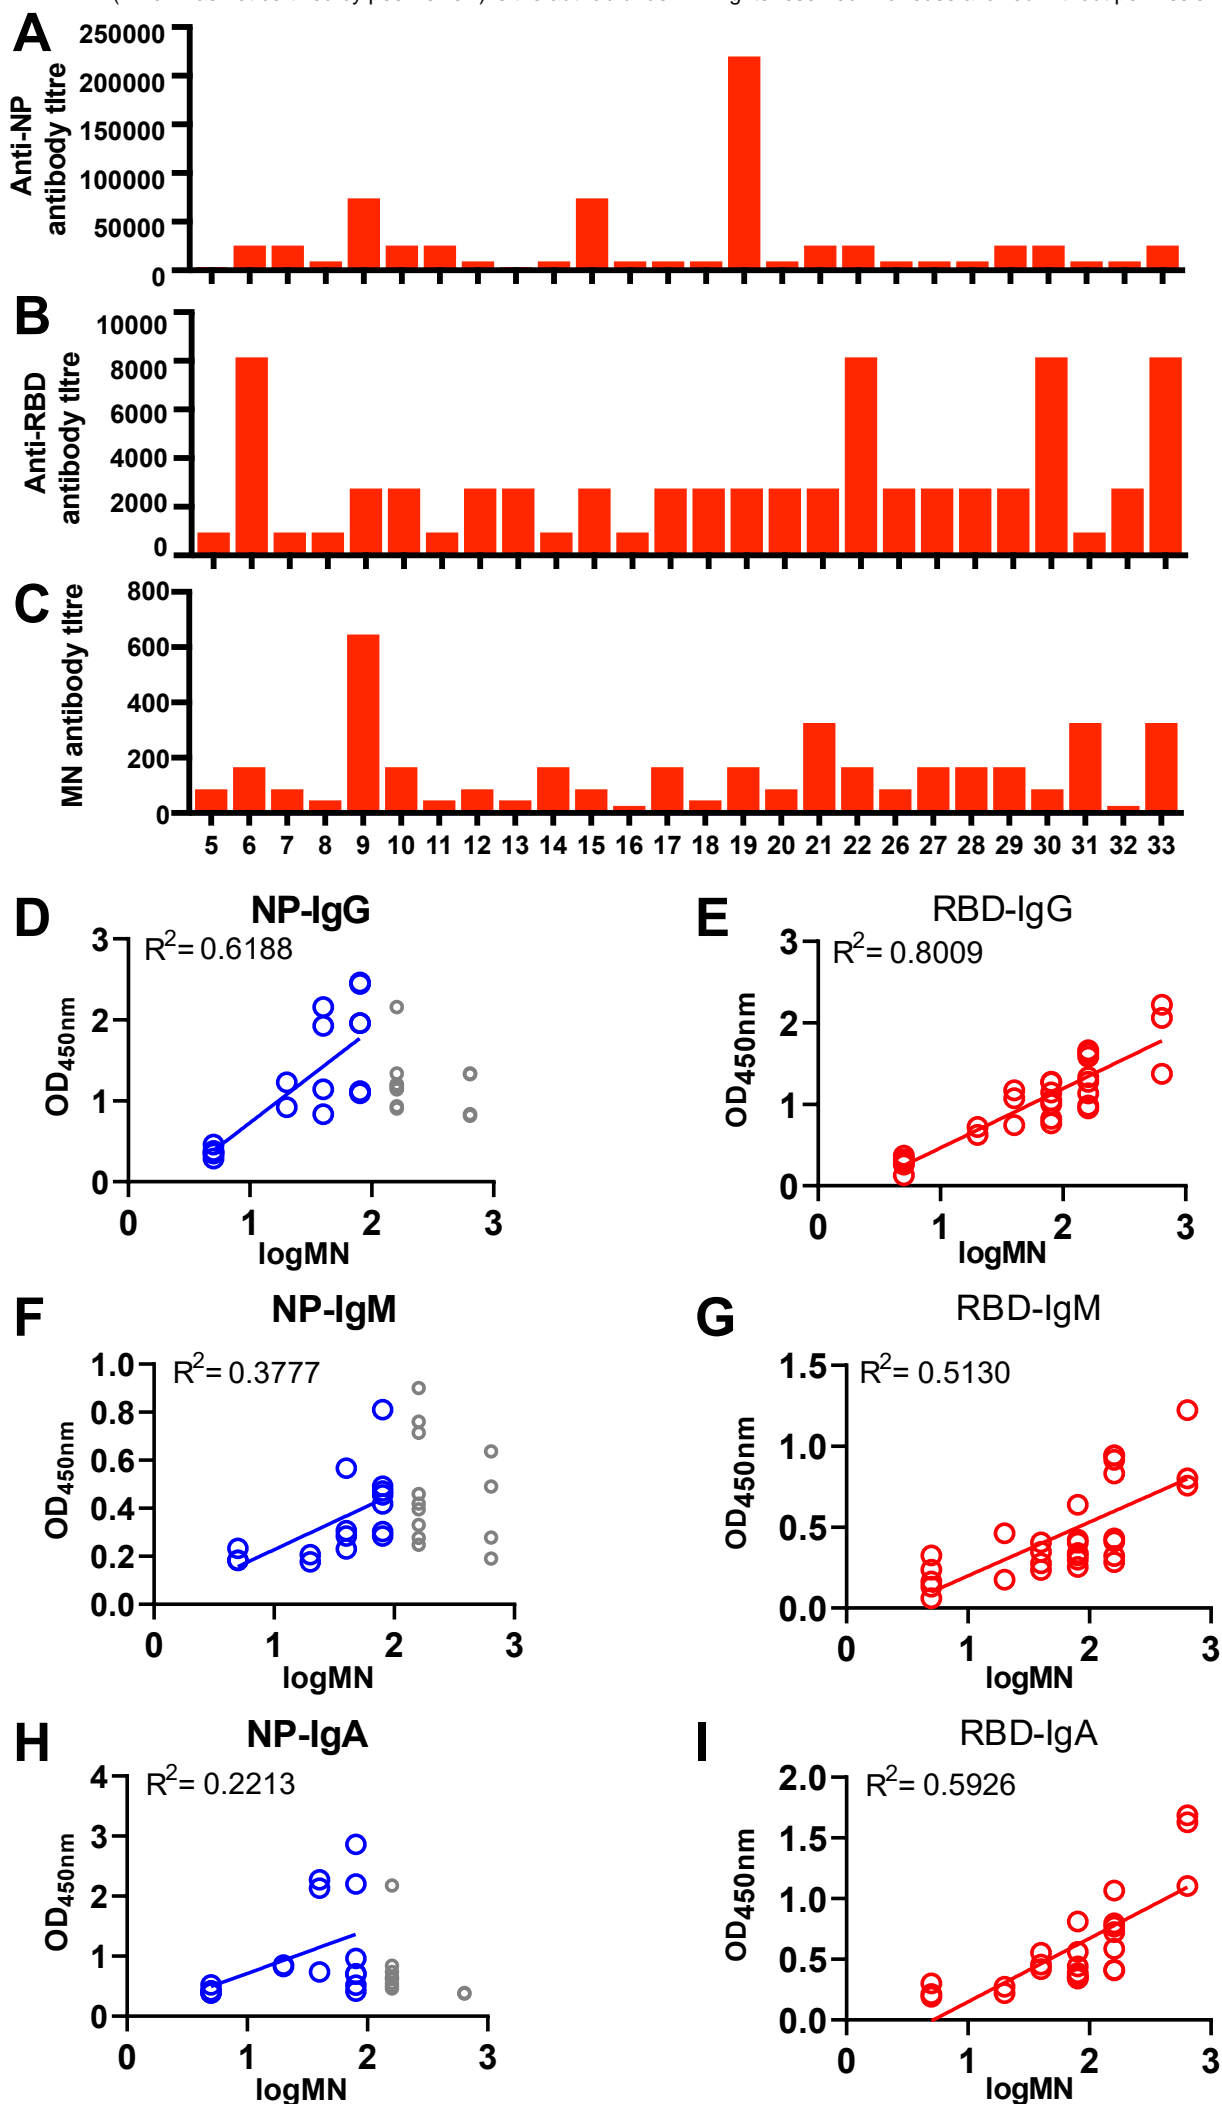

**A**

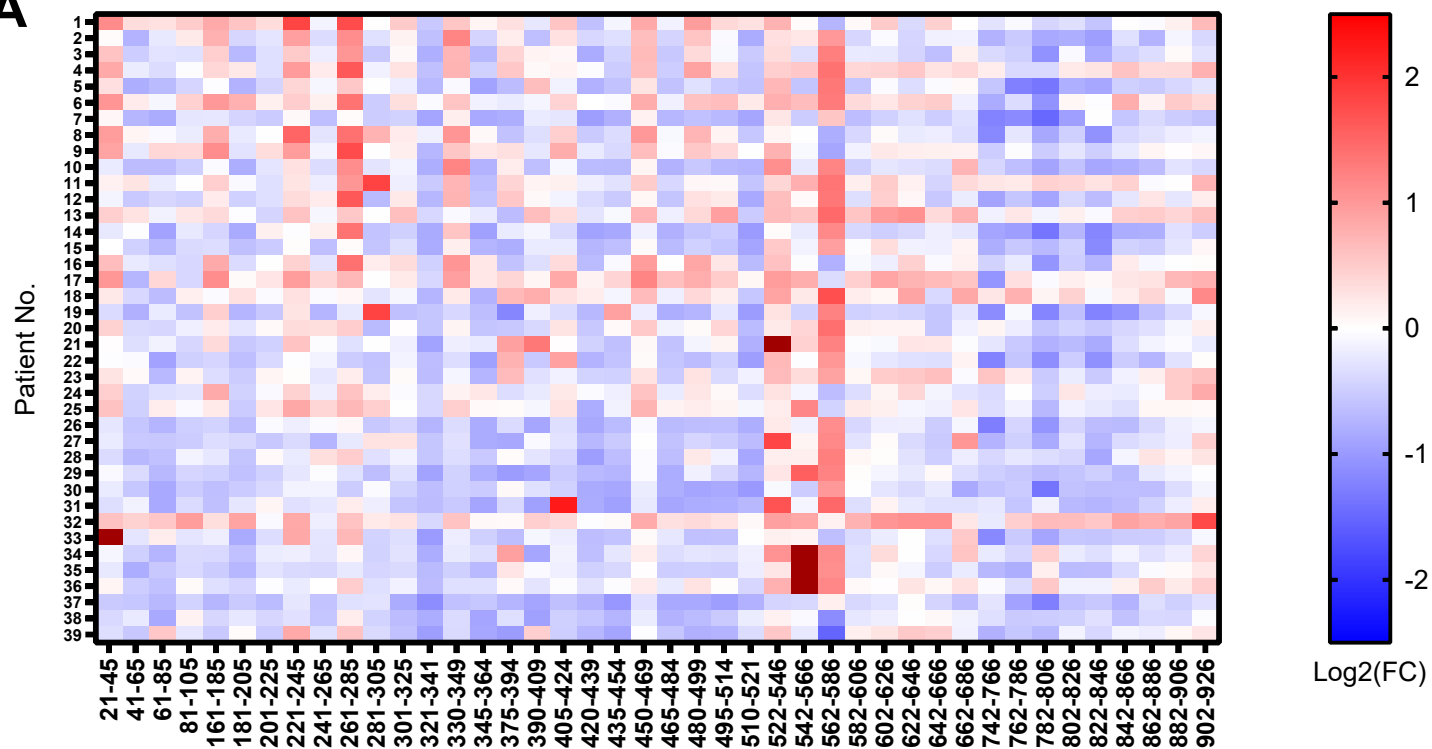

**B**

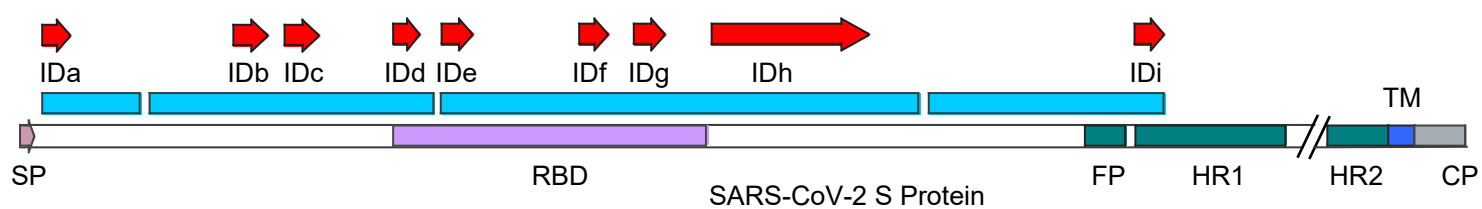

**C**

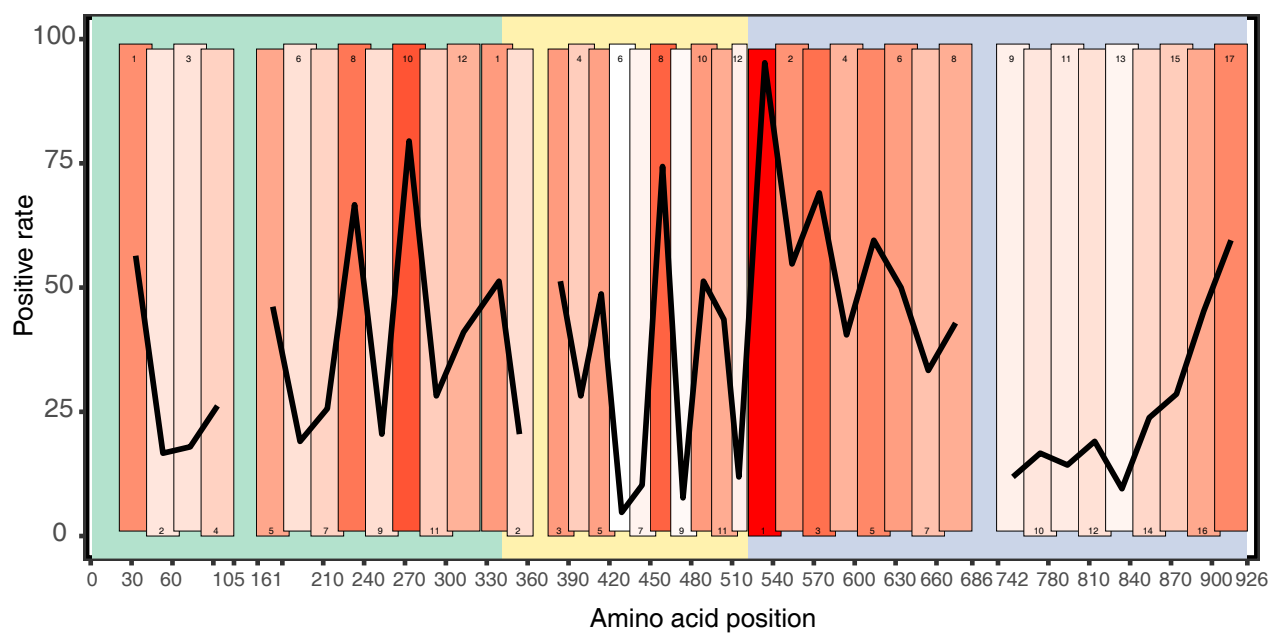

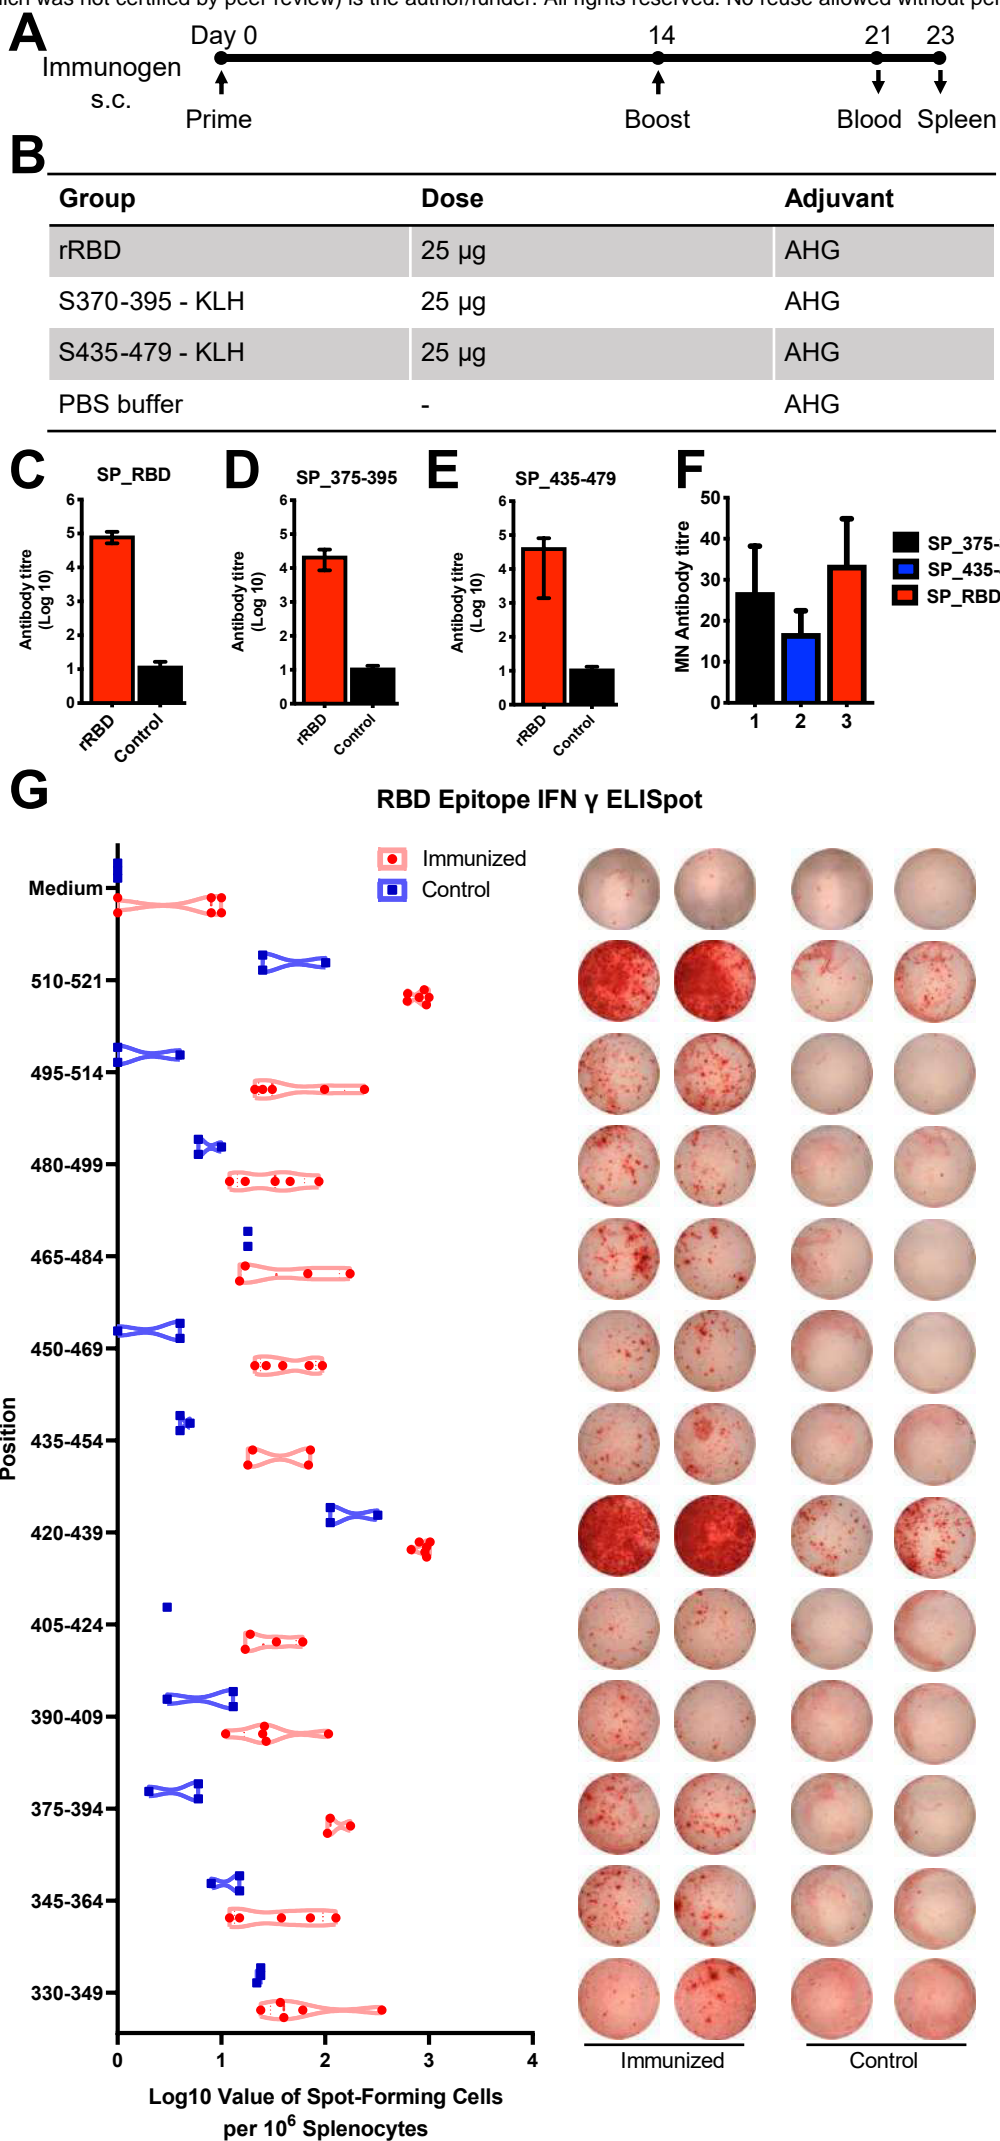

# Figure 5

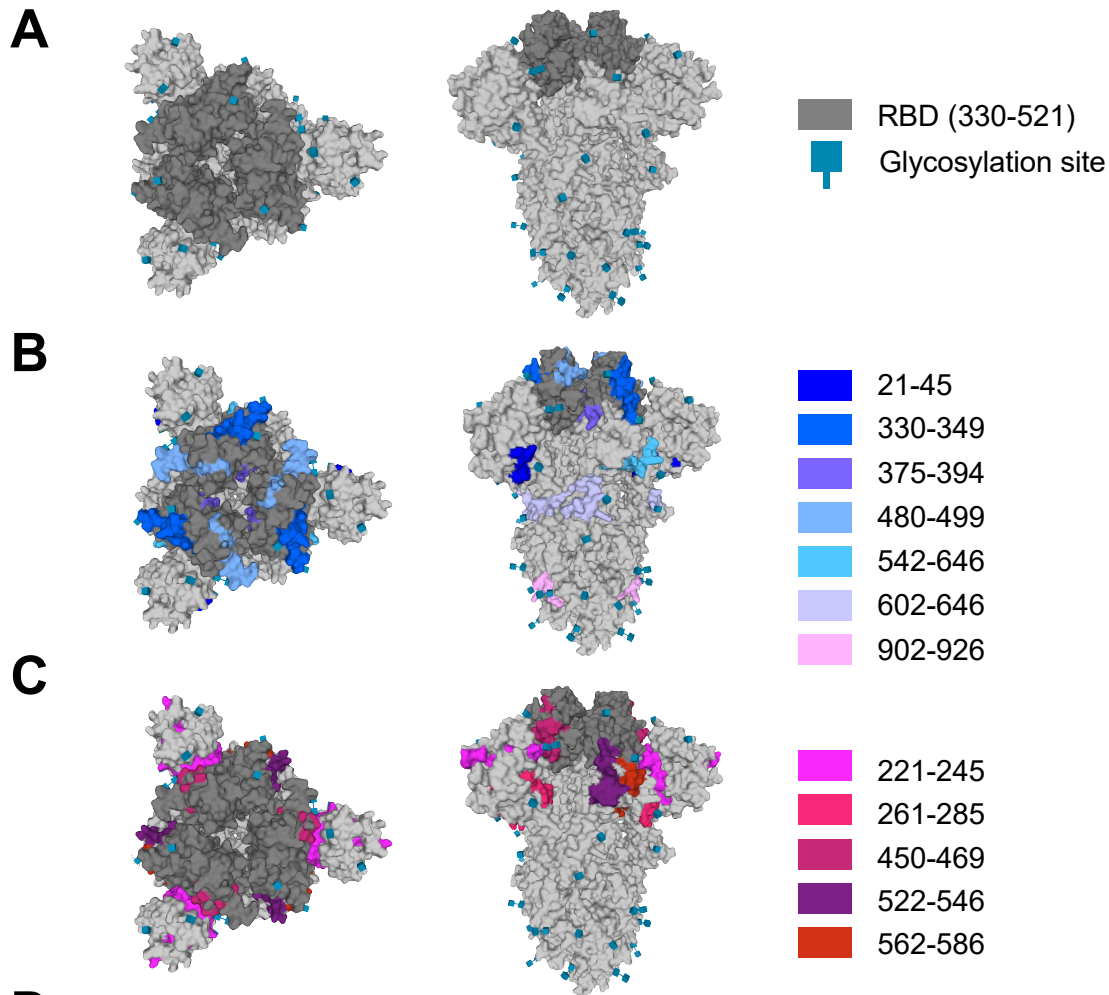

**D**

SARS-CoV-2 295 PLSETKCTLKSFTEVEKGIYQTSNFRVQPOTESIVREFNITNLCPFGEVFNATRFASVYAWN 354

PL E KC KSF ++KGIYQTSNFRV P +VREFNITNLCPFGEVFNAT F SVYAW

SARS-CoV 282 PLAE**ELKCSVK**SFEIDKGIYQTSNFRVVP**SGD**VVREFNITNLCPFGEVFNATK**FP**SVYAW 341

. \* \* \* \* \* \* \* \*

SARS-CoV-2 355 RKRISNCVADYSVL**YN**SA**SFSTFKCYGVS**PTK**LN**DL**CF**TVYADSFVIRGDEV**RQ**IAPG**Q** 414

RK ISNCVADYSVL**YN**S FSTFKCYGVS T**KL**N**D**L**CF** NVYADSFV+ GD+VR**Q**IAPG**Q**

SARS-CoV 342 RKRISNCVADYSVL**YN**ST**FF**S**T**FKCYGVSAT**KL**N**D**L**CF**SNVYADSFV**VK**GD**D**VR**Q**IAPG**Q** 401

. \* \* \* \* \* \* \* \*

▽ # # # ▽ ▽ #

SARS-CoV-2 415 T**G**KIADY**N**Y**K**LP**D**D**F**T**G**CVIA**W**NS**N**LD**S**K**V**GG**N**Y**NY**LY**R**L**F**R**K**S**N**L**K**P**F**E**R**D**I**S**TE**I**Y**Q 474

T**G** IADY**N**Y**K**LP**D**D**F** G**C**V **A**W**N** **N** **D** G**N**Y**N**Y **Y**R **R** **L** P**F**E**R**D**I**S **+**

SARS-CoV 402 T**G**VIADY**N**Y**K**LP**D**D**F**M**G**CVL**A**W**N**TR**N**I**D**A**T**ST**G**N**Y**N**Y**K**Y**R**L**R**H**G**K**L**R**P**F**E**R**D**I**S**N**V**P**F**S** 461

↑ # # # # # # # # ↑↑

. \* \* \* \* \* \* \*

▽▽ ▽ ▽ ▽ ▽ ▽ # # # # # # # # # # # # # #

SARS-CoV-2 475 A**G**S**T**P**C****N**G**V**E**G**F**N**C**Y**F**F**L**P**L**Q**S**Y**G**F**O**H**T**N**G**V**G**Y**Q**P**Y**R**V**V**L**S**F**E**L**L**H**A**P**A**T**V**C**G**P**K**R**S**T**N**L**V** 534

**P**C **N**C**Y** **P**L **Y**G**F** **T** **G**+**G**Y**Q**P**Y**R**V**V**L**S**F**E**L**L **A**P**A**T**V**C**G**P**K** **S**T**+**L**+**

SARS-CoV 462 **P**D**G**K**P**C**T**P**-**P**A**L**N**C**Y**W**L**N**D**Y**G**F**Y**T**T**T**G**I**G**Y**Q**P**Y**R**V**V**L**S**F**E**L**L**N**A**P**A**T**V**C**G**P**K**L**S**T**D**L**I 520

↑ \* \* \* \* \* \* \* \*

### ## # # # # # # # # # # # # # # # # # #

△△△ △△△ △△△ △△△ △△△ △△△ △△△ △△△

\_ CR3022 \* m396 . 80R # F26G19 △ACE2

□ Glycosylation site † Prominent Alteration      SARS-CoV-2 ID      SARS-CoV ID
